# Supplementary material for: Achieving high-sensitivity dual-mode optical thermometry via phonon-assisted cross-relaxation in a double-perovskite structured up-conversion phosphor
Source: Royal Society of Chemistry journal article supplement (doi:10.1039/d4qi00395k), 2024-01-01
Supplement: d4qi00395k1.pdf [file d4qi00395k1.pdf]

## Supporting Information

### **Achieving high-sensitive dual-mode optical thermometry via phonon-assisted cross-relaxation in double-perovskite structured up-conversion phosphor**

Houhe Dong<sup>a,1</sup>, Zonghao Lei<sup>a,1</sup>, Shikun Su<sup>a</sup>, Wenhua Yang<sup>a\*</sup>, Xuyang Zhang<sup>a</sup>, Wenyong Teng<sup>a</sup>, Guangyue Zu<sup>a</sup>, Bing Teng<sup>a, b\*</sup>, Degao Zhong<sup>a, b, c\*</sup>

<sup>a</sup>College of Physics, University-Industry Joint Center for Ocean Observation and Broadband Communication, Qingdao University, Qingdao 266071, China,

<sup>b</sup>Qingdao Broadband Terahertz Spectroscopy Technology Engineering Research Center (Qingdao University), Qingdao 266071, China

<sup>c</sup>Weihai Innovation Research Institute of Qingdao University, Weihai 264200, China

<sup>1</sup> These authors contributed equally to this work

\* Corresponding author.

Email: [yangwh@qdu.edu.cn](mailto:yangwh@qdu.edu.cn) (Wenhua Yang), [5108tb@163.com](mailto:5108tb@163.com) (Bing Teng), [zhdg2008@126.com](mailto:zhdg2008@126.com) (Degao Zhong)

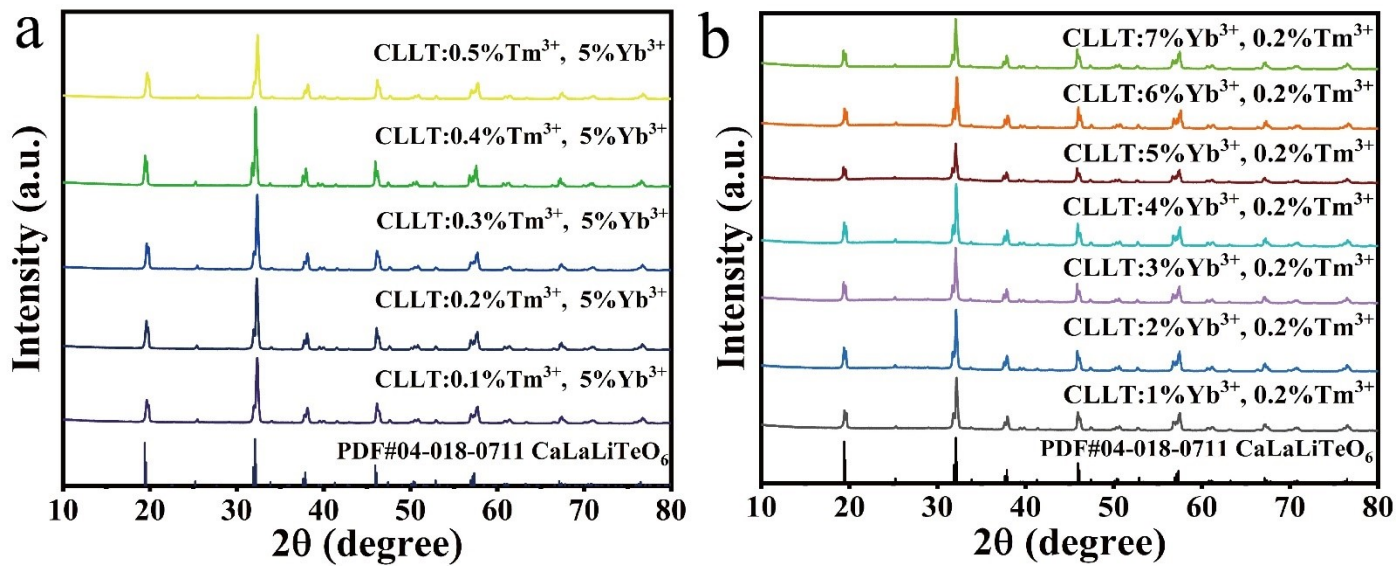

**Fig. S1.** (a and b) XRD profiles of  $\text{CaLaLiTeO}_6: x\text{Tm}^{3+}, 5\%\text{Yb}^{3+}$  and  $\text{CaLaLiTeO}_6: 0.2\%\text{Tm}^{3+}, x\text{Yb}^{3+}$  phosphors with diverse doping contents.

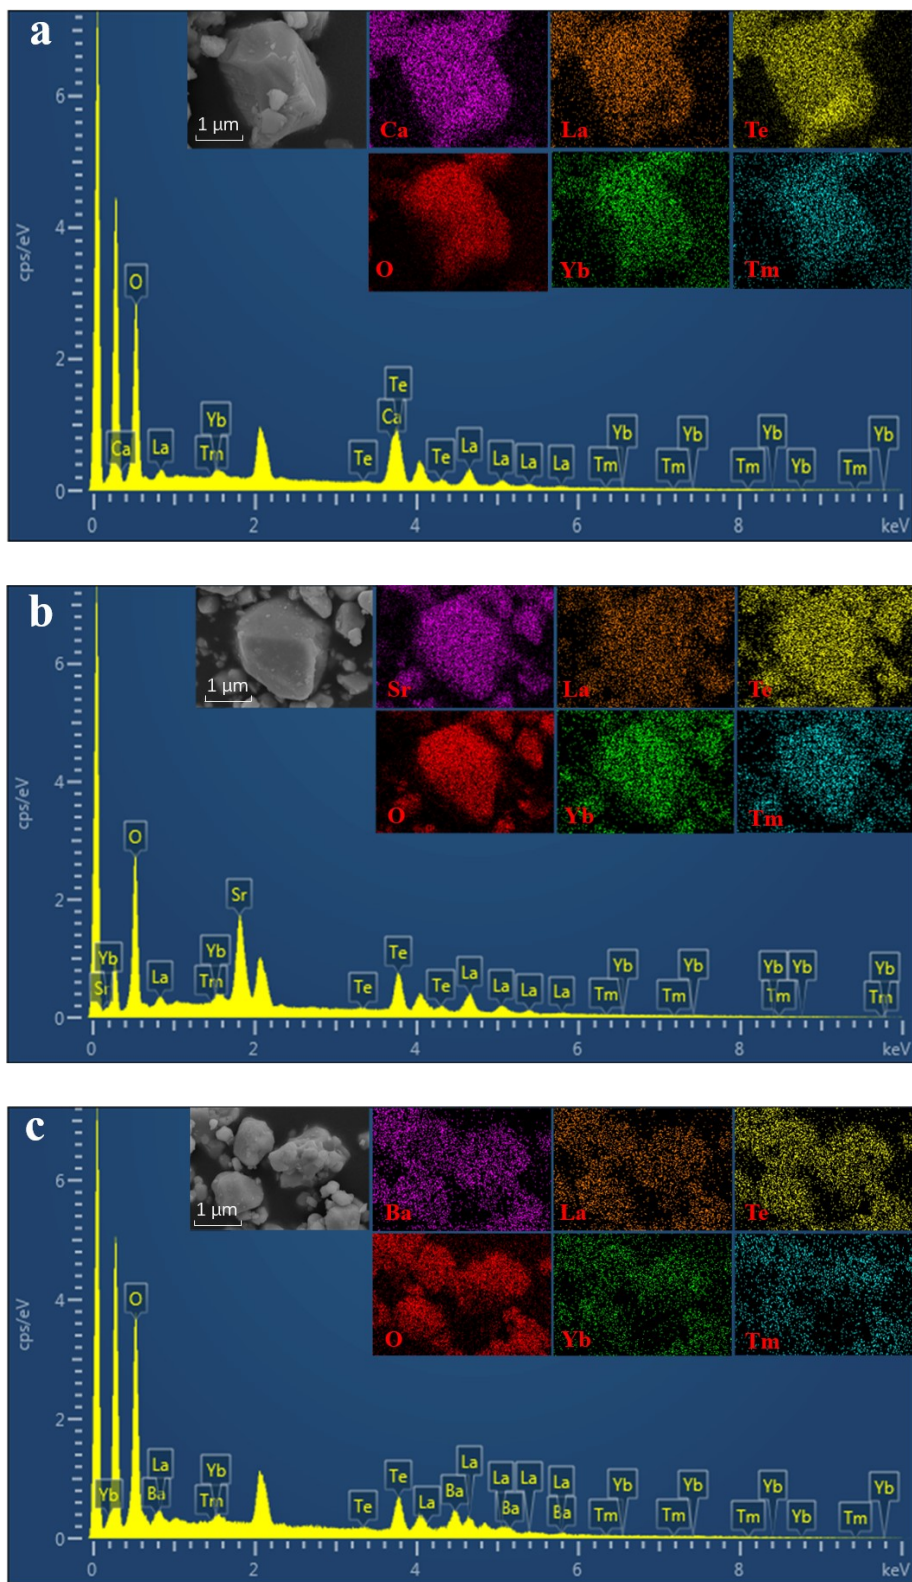

**Fig. S2.** SEM and elemental mapping images of the (a) CaLaLiTeO<sub>6</sub>: 0.2% Tm<sup>3+</sup>, 5% Yb<sup>3+</sup>, (b) SrLaLiTeO<sub>6</sub>: 0.2% Tm<sup>3+</sup>, 5% Yb<sup>3+</sup>, (c) BaLaLiTeO<sub>6</sub>: 0.2% Tm<sup>3+</sup>, 5% Yb<sup>3+</sup> phosphors.

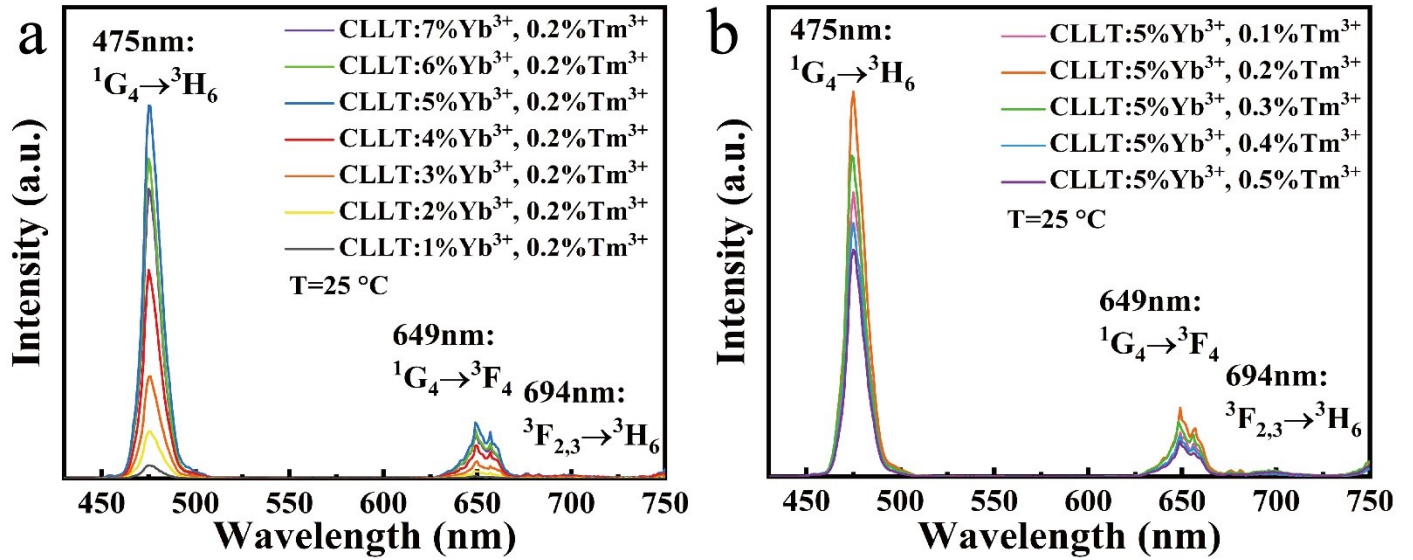

**Fig. S3.** (a and b) Emission spectra of CaLaLiTeO<sub>6</sub>: xTm<sup>3+</sup>, 5%Yb<sup>3+</sup> and CaLaLiTeO<sub>6</sub>: 0.2% Tm<sup>3+</sup>, xYb<sup>3+</sup> phosphors with diverse doping contents.

### The optimal doping concentration

Use CaLaLiTeO<sub>6</sub>: xYb<sup>3+</sup>, xTm<sup>3+</sup> to study the optimal doping concentration of Yb<sup>3+</sup> and Tm<sup>3+</sup>, fix the doping concentration of Yb<sup>3+</sup> and Tm<sup>3+</sup> in sequence, and change the concentration of another ion so as to cause a concentration gradient change. The PL spectra of CaLaLiTeO<sub>6</sub>: xYb<sup>3+</sup>, 0.2% Tm<sup>3+</sup> excited by a 980nm light source are shown in Fig. S3a. In this system, concentration quenching occurs when x>5%. This is because with the continuous increase of Yb<sup>3+</sup> ion concentration, the sensitization of Yb<sup>3+</sup> to Tm<sup>3+</sup> is gradually replaced by reverse energy transfer [BET:  $^2F_{7/2}(Yb^{3+})+^3H_4(Tm^{3+}) \rightarrow ^2F_{5/2}(Yb^{3+})+^3H_6(Tm^{3+})$  or  $^2F_{7/2}(Yb^{3+})+^3F_4(Tm^{3+}) \rightarrow ^2F_{5/2}(Yb^{3+})+^3H_6(Tm^{3+})$ ]. The test results reveal that the luminescence intensity is optimal when the doping concentration of Yb<sup>3+</sup> is 5%. Then, fix the concentration of 5% Yb<sup>3+</sup>, so that the concentration of Tm<sup>3+</sup> gradient changes from 0.1% to 0.5%. As shown in Fig.S3b, when the doping concentration of Tm<sup>3+</sup> is 0.2%, the emission intensity of the sample decreases with further increase of Tm<sup>3+</sup> concentration due to concentration quenching effect. Therefore, the optimal doping concentration of CaLaLiTeO<sub>6</sub> is 5% Yb<sup>3+</sup>, 0.2% Tm<sup>3+</sup>. In future studies, we will explore the optical properties of SrLaLiTeO<sub>6</sub> and BaLaLiTeO<sub>6</sub> based on this concentration.

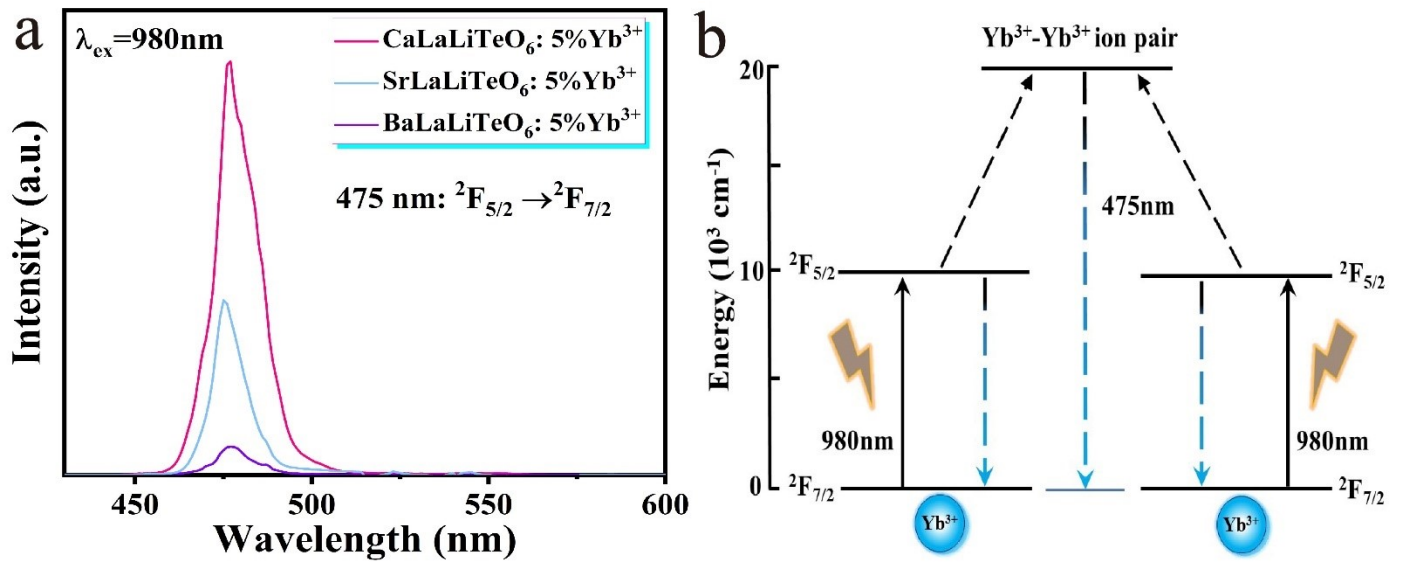

Fig. S4. (a) Up-conversion PL spectra of ALaLiTeO<sub>6</sub>: 5% Yb<sup>3+</sup> (A = Ca, Sr, Ba) phosphor. (b) The energy level transition process diagram of ALaLiTeO<sub>6</sub>: 5% Yb<sup>3+</sup> phosphor.

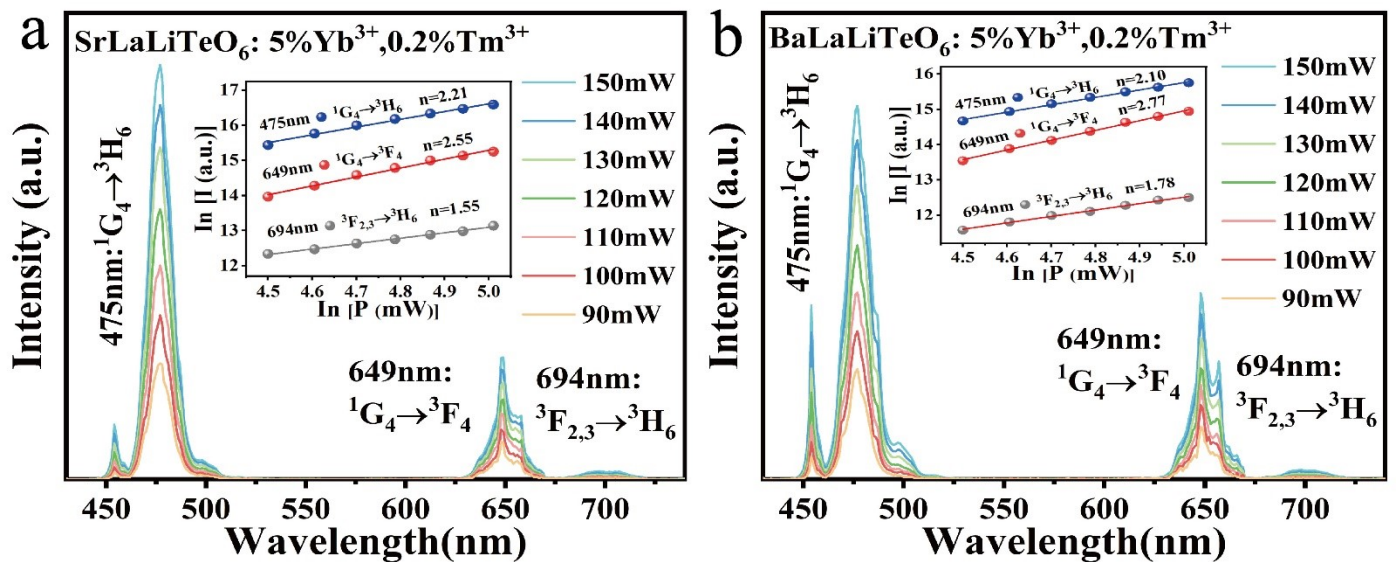

Fig. S5. The relationship between  $\ln(I)$  and  $\ln(P)$  of (a) SrLaLiTeO<sub>6</sub>: 5% Yb<sup>3+</sup>, 0.2% Tm<sup>3+</sup> and (b) BaLaLiTeO<sub>6</sub>: 5% Yb<sup>3+</sup>, 0.2% Tm<sup>3+</sup>.

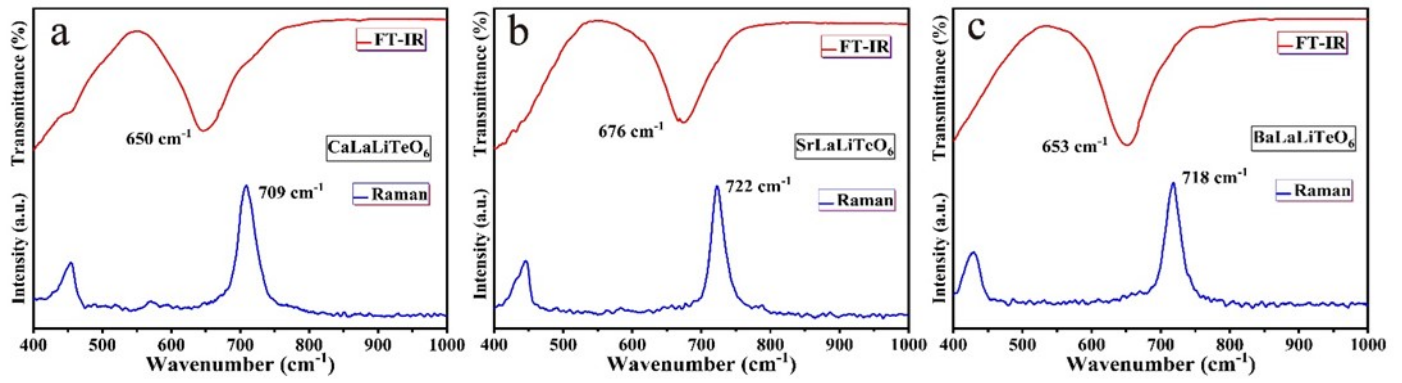

**Fig. S6.** FT-IR and Raman spectra of (a)  $\text{CaLaLiTeO}_6$ : 5%  $\text{Yb}^{3+}$ , 0.2%  $\text{Tm}^{3+}$ , (b)  $\text{SrLaLiTeO}_6$ : 5%  $\text{Yb}^{3+}$ , 0.2%  $\text{Tm}^{3+}$  and (c)  $\text{BaLaLiTeO}_6$ : 5%  $\text{Yb}^{3+}$ , 0.2%  $\text{Tm}^{3+}$  phosphor.

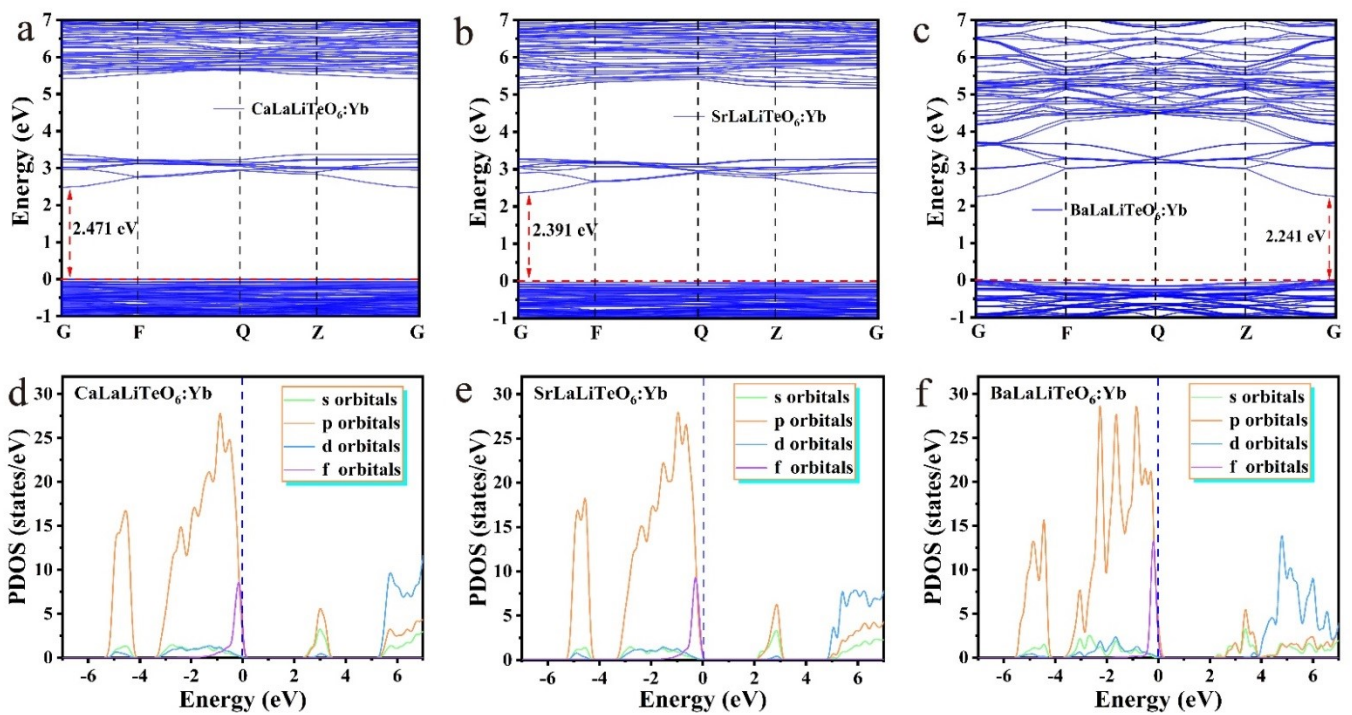

**Fig. S7.** Calculated band structure of (a)  $\text{CaLaLiTeO}_6$ : Yb, (b)  $\text{SrLaLiTeO}_6$ : Yb, (c)  $\text{BaLaLiTeO}_6$ : Yb. The PDOS, bonding and anti-bonding orbitals of (d)  $\text{CaLaLiTeO}_6$ : Yb, (e)  $\text{SrLaLiTeO}_6$ : Yb, (f)  $\text{BaLaLiTeO}_6$ : Yb.

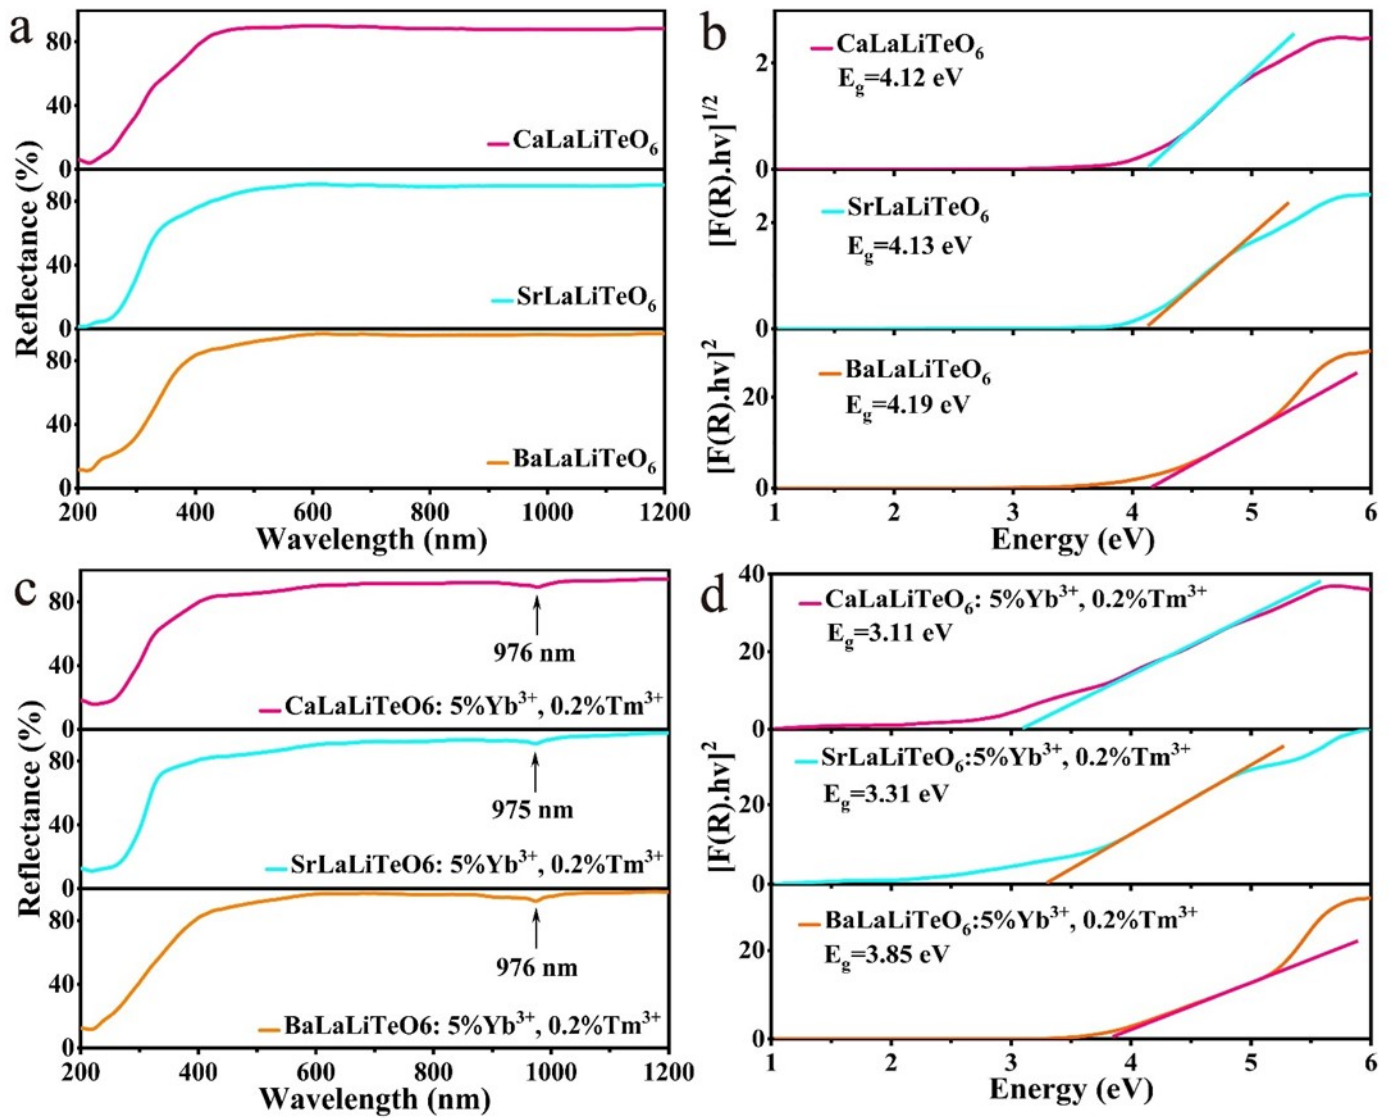

**Fig. S8.** UV-Vis-NIR absorption spectra of (a) matrix ALaLiTeO<sub>6</sub>: (A = Ca, Sr, Ba) phosphors and (c) ALaLiTeO<sub>6</sub>: 5 % Yb<sup>3+</sup>, 0.2% Tm<sup>3+</sup> (A = Ca, Sr, Ba) phosphors in diffuse reflection mode; (b) and (d) Kubelka–Munk plots to estimate the optical band gap energies of the synthesized phosphors.

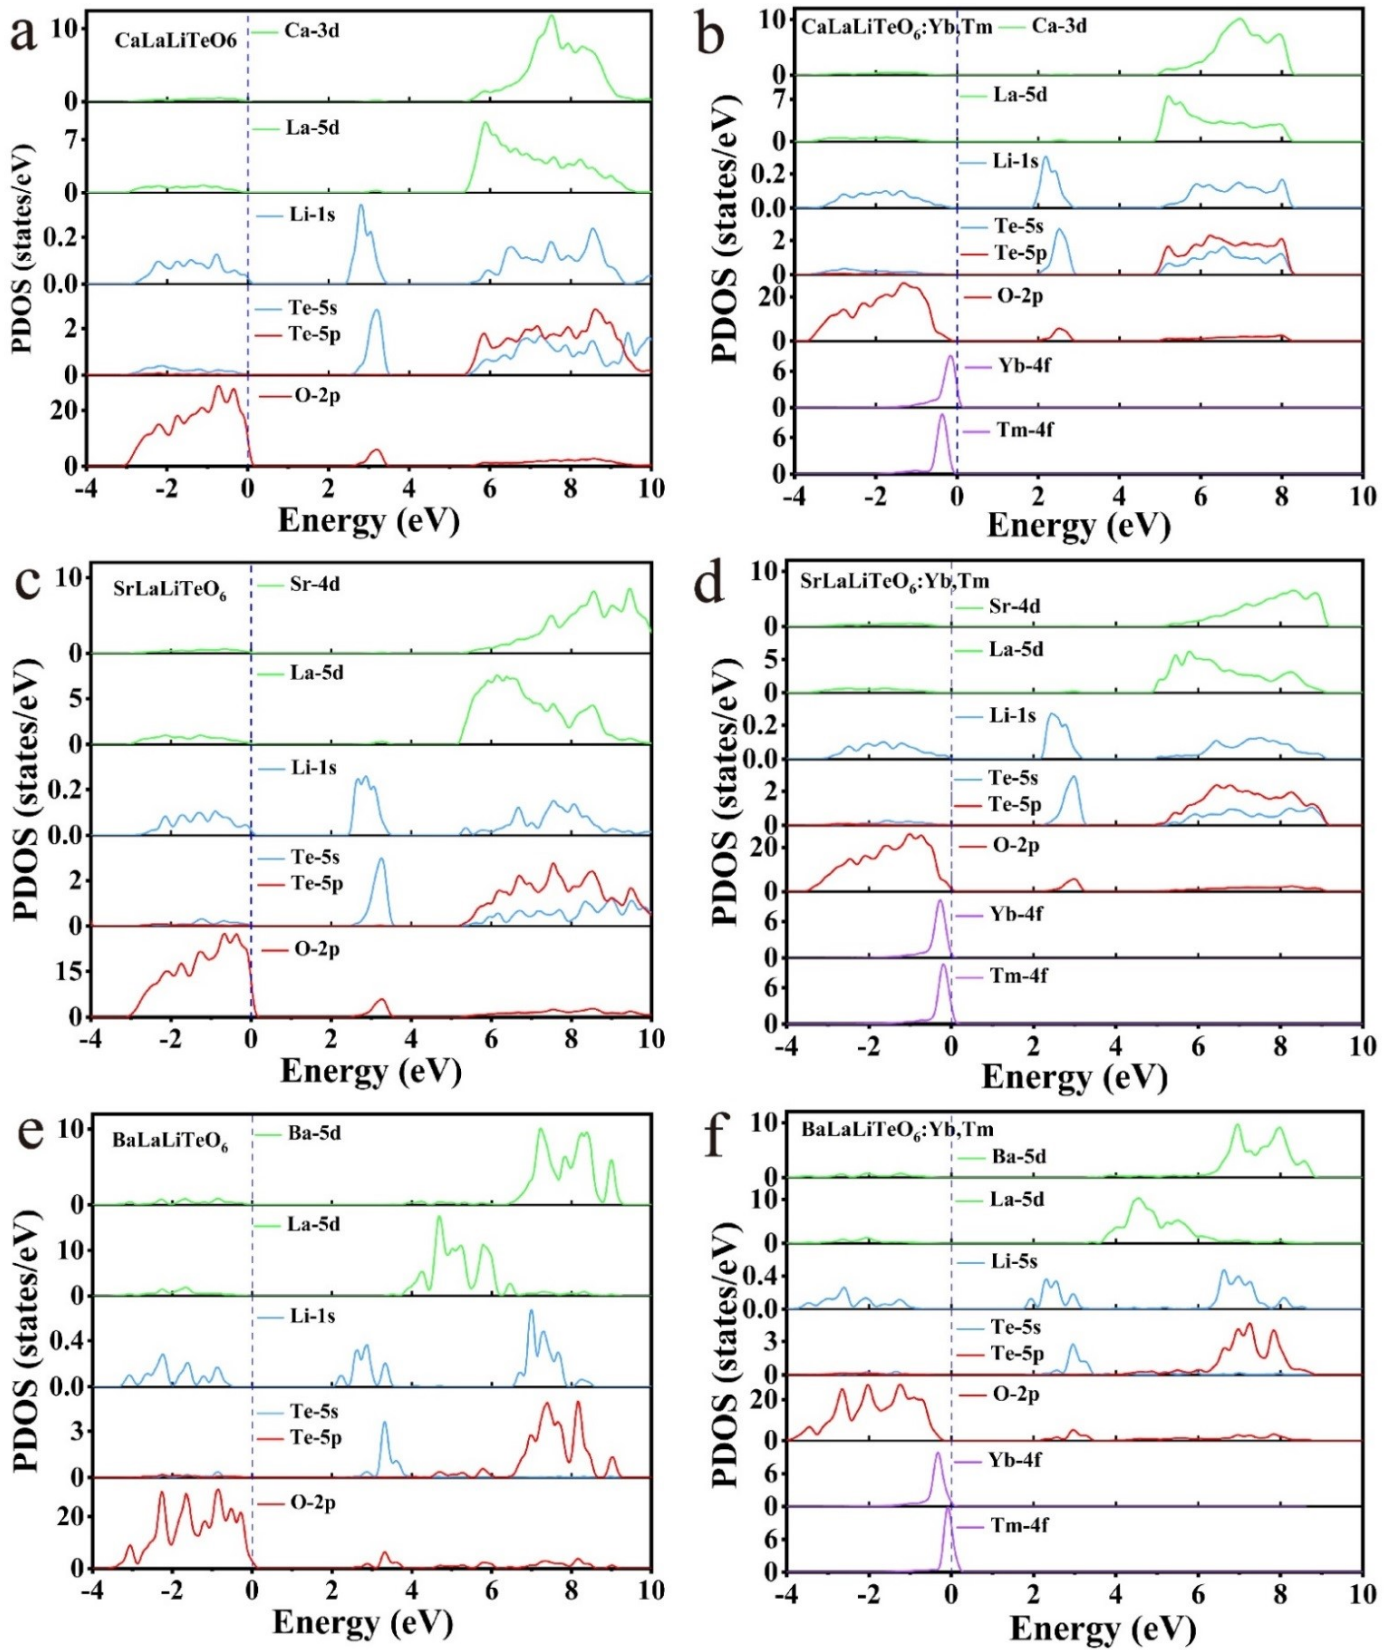

Fig. S9. Calculated partial density of states for (a)  $\text{CaLaLiTeO}_6$ , (b)  $\text{CaLaLiTeO}_6$ : Yb, Tm; (c)  $\text{SrLaLiTeO}_6$ , (d)  $\text{SrLaLiTeO}_6$ : Yb, Tm; (e)  $\text{BaLaLiTeO}_6$ , (f)  $\text{BaLaLiTeO}_6$ : Yb, Tm.



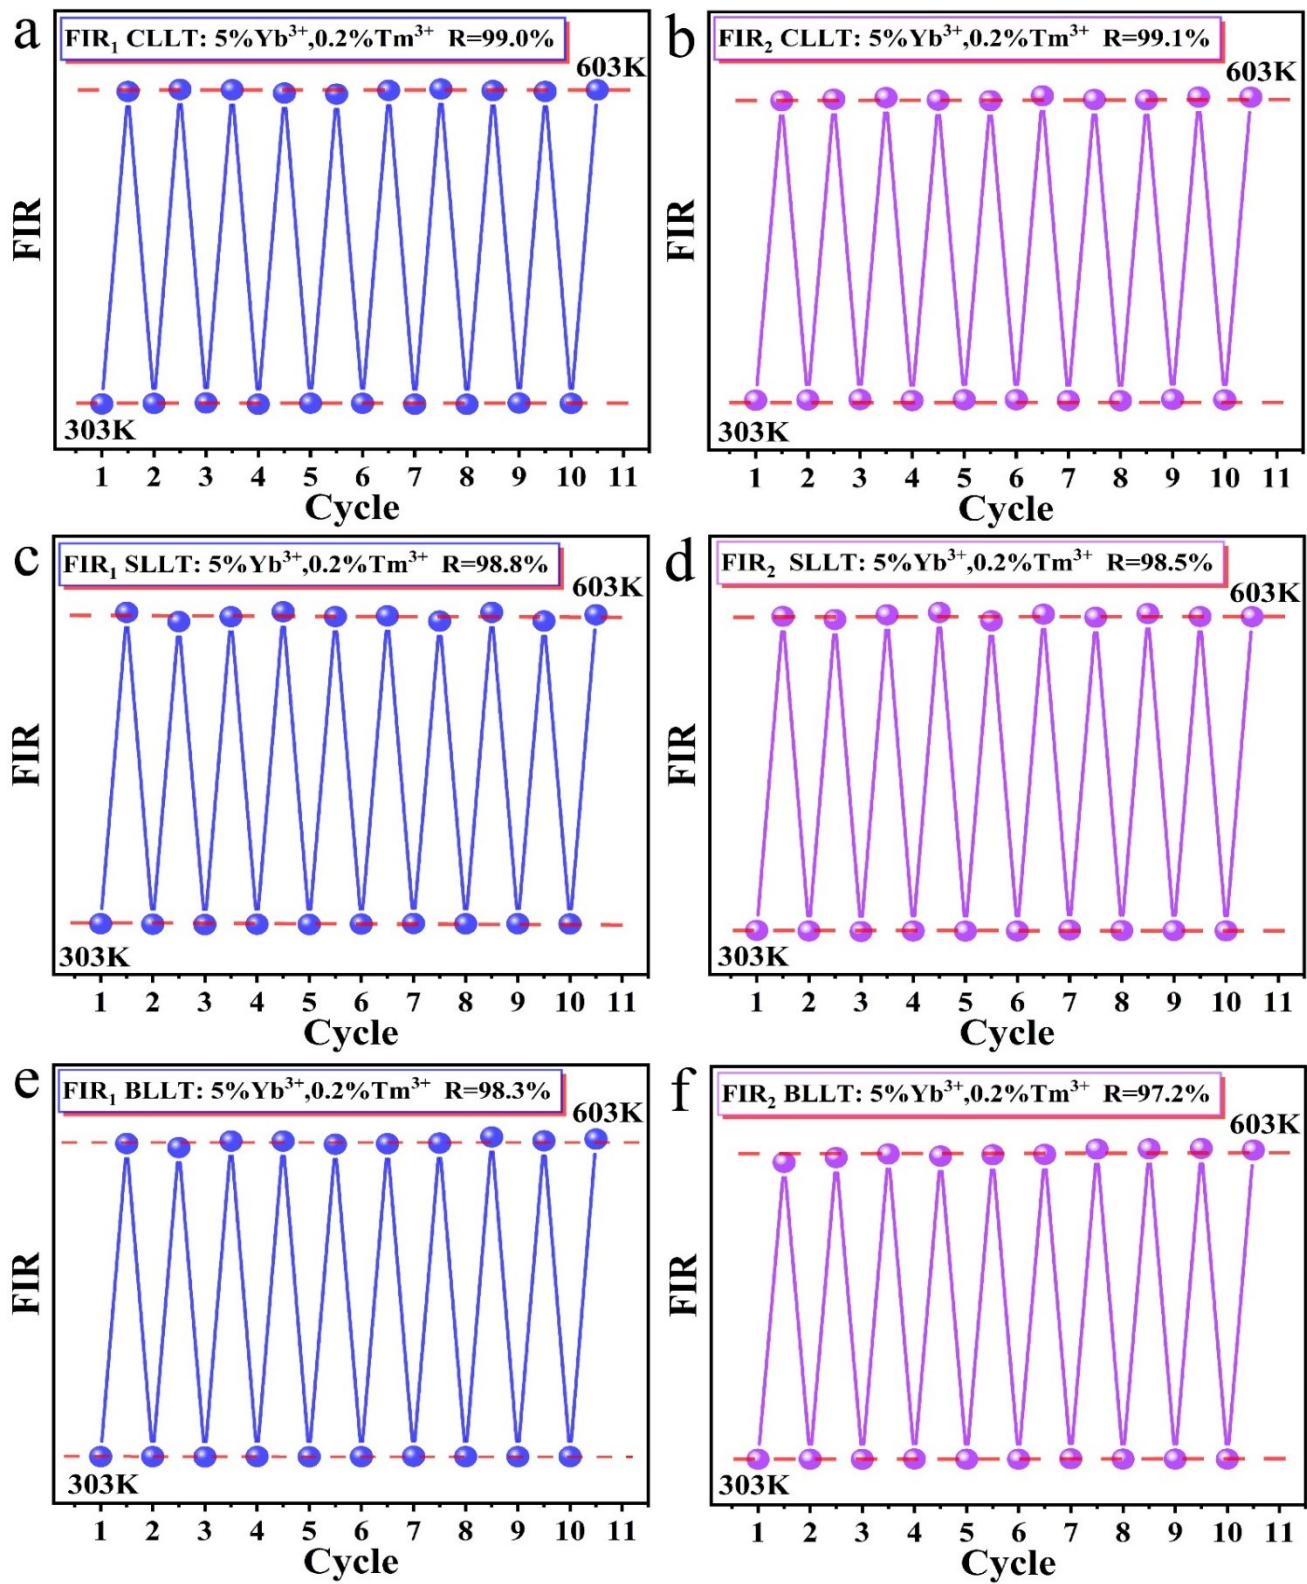

Fig. S10. (a-f) Repeatability heating-cooling cycles between 303 to 603 K of  $\text{ALaLiTeO}_6$ : 5%  $\text{Yb}^{3+}$ , 0.2%  $\text{Tm}^{3+}$ .

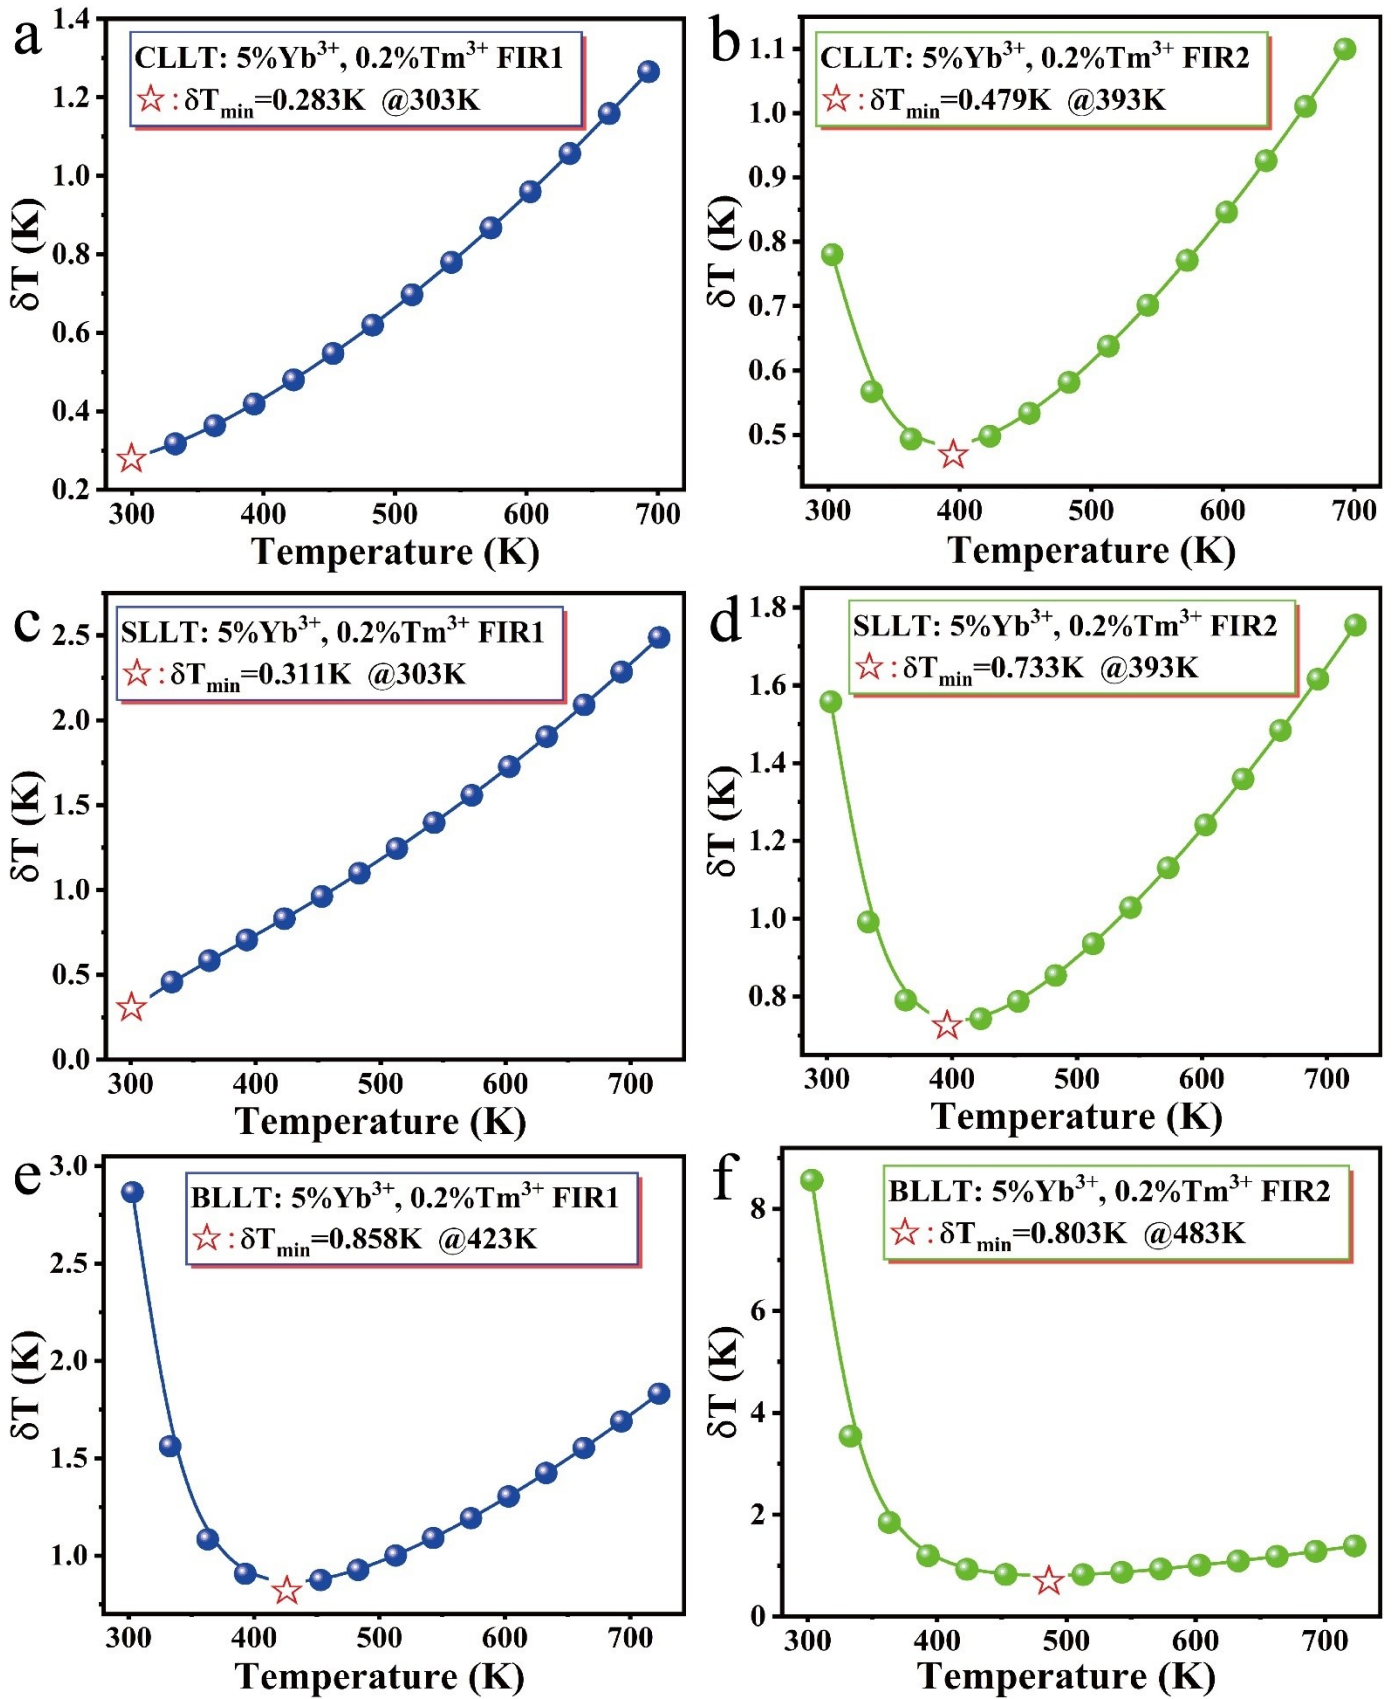

Fig. S11. (a-f) The calculation of  $\delta T$  results for  $\text{ALaLiTeO}_6: 5\% \text{Yb}^{3+}, 0.2\% \text{Tm}^{3+}$ .

## Supplementary Tables

**Table S1.** Refined crystallographic parameters of CaLaLiTeO<sub>6</sub>: 5% Yb<sup>3+</sup>, 0.2% Tm<sup>3+</sup>.

| CLLT | Wyckoff sites | x       | y       | z       | Occupancy |
|------|---------------|---------|---------|---------|-----------|
| Ba1  | 4e            | 0.15326 | 0.02467 | 0.24374 | 1.00000   |
| O1   | 4e            | 0.24925 | 0.72378 | 0.04729 | 1.00000   |
| O2   | 4e            | 0.24456 | 0.49054 | 0.24382 | 0.50000   |
| Ca3  | 4e            | 0.26478 | 0.45069 | 0.25237 | 0.46900   |
| La4  | 4e            | 0.32283 | 0.19227 | 0.04174 | 1.00000   |
| O5   | 2d            | 0.50000 | 0.00000 | 0.50000 | 1.00000   |
| Li6  | 2a            | 0.00000 | 0.00000 | 0.00000 | 1.00000   |
| Te7  | 4e            | 0.26478 | 0.45069 | 0.25237 | 0.03000   |
| Yb8  | 4e            | 0.26478 | 0.45069 | 0.25237 | 0.00100   |
| Tm9  | 4e            | 0.15326 | 0.02467 | 0.24374 | 1.00000   |

**Table S2.** Refined crystallographic parameters of SrLaLiTeO<sub>6</sub>: 5% Yb<sup>3+</sup>, 0.2% Tm<sup>3+</sup>.

| SLLT | Wyckoff sites | x       | y       | z       | Occupancy |
|------|---------------|---------|---------|---------|-----------|
| O1   | 4e            | 0.10536 | 0.05909 | 0.23061 | 1.00000   |
| O2   | 4e            | 0.24147 | 0.71703 | 0.07528 | 1.00000   |
| a3   | 4e            | 0.26775 | 0.44071 | 0.25336 | 0.46900   |
| Sr4  | 4e            | 0.26929 | 0.44222 | 0.25294 | 0.50000   |
| O5   | 4e            | 0.34466 | 0.17223 | 0.05485 | 1.00000   |
| Li6  | 2d            | 0.50000 | 0.00000 | 0.50000 | 1.00000   |
| Te7  | 2c            | 0.00000 | 0.00000 | 0.00000 | 1.00000   |
| Yb8  | 4e            | 0.26775 | 0.44071 | 0.25336 | 0.03000   |
| Tm9  | 4e            | 0.26775 | 0.44071 | 0.25336 | 0.00100   |

**Table S3.** Refined crystallographic parameters of BaLaLiTeO<sub>6</sub>: 5% Yb<sup>3+</sup>, 0.2% Tm<sup>3+</sup>.

| BLLT | Wyckoff sites | x       | y       | z       | Occupancy |
|------|---------------|---------|---------|---------|-----------|
| La1  | 4e            | 0.25000 | 0.25000 | 0.25000 | 0.46900   |
| O2   | 2e            | 0.23016 | 0.00000 | 0.00000 | 0.50000   |
| Ba3  | 4e            | 0.25000 | 0.25000 | 0.25000 | 1.00000   |
| Li4  | 2d            | 0.50000 | 0.50000 | 0.50000 | 1.00000   |
| Te5  | 2c            | 0.00000 | 0.00000 | 0.00000 | 1.00000   |
| Yb6  | 4e            | 0.25000 | 0.25000 | 0.25000 | 0.03000   |
| Tm7  | 4e            | 0.25000 | 0.25000 | 0.25000 | 0.00100   |

**Table S4.** Table of cation radius differences for different substitutions.

| $R_s$                 | $Ca^{2+}(\text{pm})$ | $Sr^{2+}(\text{pm})$ | $Ba^{2+}(\text{pm})$ | $La^{3+}(\text{pm})$ |
|-----------------------|----------------------|----------------------|----------------------|----------------------|
| r                     | 112                  | 126                  | 142                  | 116                  |
| $D_r(\text{Yb}^{3+})$ | 12.1%                | 21.8%                | 30.6%                | 15.1%                |
| $D_r(\text{Tm}^{3+})$ | 11.3%                | 21.1%                | 30%                  | 14.3%                |

**Table S5.** Energy value of simplified energy levels to the ground level for  $\text{Tm}^{3+}$  ions, and the energy gap of selected transitions in  $\text{Tm}^{3+}$ .

| Energy level | Energy( $\text{cm}^{-1}$ ) | Transition                         | $\Delta E(\text{cm}^{-1})$ |
|--------------|----------------------------|------------------------------------|----------------------------|
| $^1D_2$      | 28010                      | NR1: $^3H_5 \rightarrow ^3F_4$     | 2510                       |
| $^1G_4$      | 21450                      | NR2: $^3F_{2,3} \rightarrow ^3H_4$ | 1530~2030                  |
| $^3F_2$      | 14800                      | CR1: $^3H_4 \rightarrow ^1D_2$     | -15240                     |
| $^3F_3$      | 14300                      | CR1: $^1G_4 \rightarrow ^3F_4$     | 15830                      |
| $^3H_4$      | 12770                      | CR2: $^1G_4 \rightarrow ^1D_2$     | -6560                      |
| $^3H_5$      | 8430                       | CR2: $^3H_4 \rightarrow ^3F_4$     | 6850                       |
| $^3F_4$      | 5920                       | CR3: $^1G_4 \rightarrow ^3F_{2,3}$ | 6650~7150                  |
| $^3H_6$      | 0                          | CR3: $^3H_6 \rightarrow ^3F_4$     | -5920                      |

**Table S6.** Thermometry sensitivity of Yb<sup>3+</sup> and Tm<sup>3+</sup> co-doped up-conversion phosphors.

| Phosphors                                                                                             | Transitions                                                                                                             | Temperature (K) | S <sub>a</sub> (% K <sup>-1</sup> ) | S <sub>r</sub> (% K <sup>-1</sup> ) | Refs      |
|-------------------------------------------------------------------------------------------------------|-------------------------------------------------------------------------------------------------------------------------|-----------------|-------------------------------------|-------------------------------------|-----------|
| Sr <sub>2</sub> GdF <sub>7</sub> : Tm <sup>3+</sup> /Yb <sup>3+</sup>                                 | <sup>3</sup> F <sub>2,3</sub> → <sup>3</sup> H <sub>6</sub> / <sup>1</sup> G <sub>4</sub> → <sup>3</sup> F <sub>4</sub> | 293-563         | 3.9                                 | 1.97                                | 1         |
| NaY <sub>2</sub> F <sub>7</sub> :Yb <sup>3+</sup> /Tm <sup>3+</sup>                                   | <sup>3</sup> F <sub>2,3</sub> → <sup>3</sup> H <sub>6</sub> / <sup>1</sup> G <sub>4</sub> → <sup>3</sup> F <sub>4</sub> | 307-567         | 10.01                               | 1.63                                | 2         |
| SrF <sub>2</sub> :Tm <sup>3+</sup> /Yb <sup>3+</sup>                                                  | <sup>3</sup> H <sub>4</sub> → <sup>3</sup> H <sub>6</sub> / <sup>1</sup> G <sub>4</sub> → <sup>3</sup> H <sub>6</sub>   | 298-573         | 0.21                                | 2.2                                 | 3         |
| Bi <sub>2</sub> SiO <sub>5</sub> :Tm <sup>3+</sup> /Yb <sup>3+</sup> @SiO <sub>2</sub>                | <sup>1</sup> G <sub>4</sub> → <sup>3</sup> F <sub>4</sub> / <sup>3</sup> F <sub>2,3</sub> → <sup>3</sup> H <sub>4</sub> | 280-400         | 1.68                                | 1.95                                | 4         |
| La <sub>2</sub> MgTiO <sub>6</sub> :Tm <sup>3+</sup> , Yb <sup>3+</sup>                               | <sup>3</sup> F <sub>2,3</sub> → <sup>3</sup> H <sub>6</sub> / <sup>1</sup> G <sub>4</sub> → <sup>3</sup> F <sub>4</sub> | 313-573         | 4.94                                | 1.92                                | 5         |
|                                                                                                       | <sup>3</sup> F <sub>2,3</sub> → <sup>3</sup> H <sub>6</sub> / <sup>1</sup> G <sub>4</sub> → <sup>3</sup> H <sub>6</sub> | 313-573         | 3.32                                | 1.63                                |           |
| La <sub>2</sub> Mo <sub>2</sub> O <sub>9</sub> : Tm <sup>3+</sup> , Yb <sup>3+</sup>                  | <sup>3</sup> F <sub>2,3</sub> → <sup>3</sup> H <sub>6</sub> / <sup>3</sup> H <sub>4</sub> → <sup>3</sup> H <sub>6</sub> | 293-553         | 0.284                               | 2.29                                | 6         |
| Ba <sub>3</sub> Y <sub>4</sub> O <sub>9</sub> :Yb <sup>3+</sup> /Tm <sup>3+</sup>                     | <sup>3</sup> F <sub>2,3</sub> → <sup>3</sup> H <sub>6</sub> / <sup>1</sup> G <sub>4</sub> → <sup>3</sup> H <sub>6</sub> | 294-573         | 0.81                                | 1.08                                | 7         |
| Sr <sub>3</sub> Y(PO <sub>4</sub> ) <sub>3</sub> : Tm <sup>3+</sup> /Yb <sup>3+</sup>                 | <sup>3</sup> F <sub>2,3</sub> → <sup>3</sup> H <sub>6</sub> / <sup>1</sup> G <sub>4</sub> → <sup>3</sup> F <sub>4</sub> | 298-573         | 1.27                                | 1.52                                | 8         |
| Ba <sub>3-x</sub> Sr <sub>x</sub> Lu <sub>4</sub> O <sub>9</sub> : Tm <sup>3+</sup> /Yb <sup>3+</sup> | <sup>1</sup> G <sub>4</sub> → <sup>3</sup> F <sub>4</sub> / <sup>3</sup> F <sub>3</sub> → <sup>3</sup> H <sub>6</sub>   | 303-573         | 1.50                                | 0.88                                | 9         |
| Ca <sub>9</sub> Y(PO <sub>4</sub> ) <sub>7</sub> : Tm <sup>3+</sup> , Yb <sup>3+</sup>                | <sup>3</sup> F <sub>2,3</sub> → <sup>3</sup> H <sub>6</sub> / <sup>1</sup> G <sub>4</sub> → <sup>3</sup> F <sub>4</sub> | 323-823         | 8.07                                | 1.07                                | 10        |
| CaIn <sub>2</sub> O <sub>4</sub> : Tm <sup>3+</sup> /Yb <sup>3+</sup>                                 | <sup>3</sup> H <sub>4</sub> → <sup>3</sup> H <sub>6</sub> / <sup>1</sup> G <sub>4</sub> → <sup>3</sup> H <sub>6</sub>   | 303-373         | 1.0                                 | 0.51                                | 11        |
| Y <sub>2</sub> O <sub>3</sub> : Tm <sup>3+</sup> /Yb <sup>3+</sup>                                    | <sup>3</sup> H <sub>4</sub> → <sup>3</sup> H <sub>6</sub> / <sup>1</sup> G <sub>4</sub> → <sup>3</sup> H <sub>6</sub>   | 303-573         | 11.7                                | 1.51                                | 12        |
| Y <sub>2</sub> Mo <sub>3</sub> O <sub>12</sub> : Tm <sup>3+</sup> /0.26Yb <sup>3+</sup>               | <sup>3</sup> F <sub>2,3</sub> → <sup>3</sup> H <sub>6</sub> / <sup>1</sup> G <sub>4</sub> → <sup>3</sup> F <sub>4</sub> | 303-583         | 19.8                                | 2.46                                | 13        |
|                                                                                                       | <sup>3</sup> F <sub>2,3</sub> → <sup>3</sup> H <sub>6</sub> / <sup>1</sup> G <sub>4</sub> → <sup>3</sup> H <sub>6</sub> | 303-583         | 3.17                                | 3.27                                |           |
| Y <sub>2</sub> Mo <sub>3</sub> O <sub>12</sub> : Tm <sup>3+</sup> /0.14Yb <sup>3+</sup>               | <sup>3</sup> F <sub>2,3</sub> → <sup>3</sup> H <sub>6</sub> / <sup>1</sup> G <sub>4</sub> → <sup>3</sup> F <sub>4</sub> | 303-503         | 13.1                                | 2.67                                | 13        |
|                                                                                                       | <sup>3</sup> F <sub>2,3</sub> → <sup>3</sup> H <sub>6</sub> / <sup>1</sup> G <sub>4</sub> → <sup>3</sup> H <sub>6</sub> | 303-503         | 2.13                                | 3.06                                |           |
| BaLu <sub>6</sub> (Ge <sub>2</sub> O <sub>7</sub> ) <sub>2</sub> (Ge <sub>3</sub> O <sub>10</sub> )   | <sup>3</sup> F <sub>2,3</sub> → <sup>3</sup> H <sub>6</sub> / <sup>3</sup> H <sub>4</sub> → <sup>3</sup> H <sub>6</sub> | 298-498         | 2.1                                 | 1.94                                | 14        |
| SrWO <sub>4</sub> : Tm <sup>3+</sup> /Yb <sup>3+</sup>                                                | <sup>3</sup> F <sub>2,3</sub> → <sup>3</sup> H <sub>6</sub> / <sup>3</sup> H <sub>4</sub> → <sup>3</sup> H <sub>6</sub> | 308-573         | 0.617                               | 0.7                                 | 15        |
| NaYTiO <sub>4</sub> : Tm <sup>3+</sup> /Yb <sup>3+</sup>                                              | <sup>3</sup> F <sub>2,3</sub> → <sup>3</sup> H <sub>6</sub> / <sup>3</sup> H <sub>4</sub> → <sup>3</sup> H <sub>6</sub> | 463-823         | 3.2                                 | 1.04                                | 16        |
| LaPO <sub>4</sub> : Tm <sup>3+</sup> /Yb <sup>3+</sup>                                                | <sup>3</sup> F <sub>2,3</sub> → <sup>3</sup> H <sub>6</sub> / <sup>3</sup> H <sub>4</sub> → <sup>3</sup> H <sub>6</sub> | 293-773         | 2.5                                 | 3.0                                 | 17        |
| Bi <sub>2</sub> Ti <sub>2</sub> O <sub>7</sub> : Tm <sup>3+</sup> /Yb <sup>3+</sup>                   | <sup>3</sup> F <sub>2,3</sub> → <sup>3</sup> H <sub>6</sub> / <sup>3</sup> H <sub>4</sub> → <sup>3</sup> H <sub>6</sub> | 300-505         | /                                   | 2.4                                 | 18        |
| CaLaLiTeO <sub>6</sub> : 5%Yb <sup>3+</sup> , 0.2%Tm <sup>3+</sup>                                    |                                                                                                                         |                 | 3.19                                | 2.11                                |           |
| SrLaLiTeO <sub>6</sub> : 5%Yb <sup>3+</sup> , 0.2%Tm <sup>3+</sup>                                    | <sup>3</sup> F <sub>2,3</sub> → <sup>3</sup> H <sub>6</sub> / <sup>1</sup> G <sub>4</sub> → <sup>3</sup> F <sub>4</sub> |                 | 8.52                                | 4.69                                |           |
| BaLaLiTeO <sub>6</sub> : 5%Yb <sup>3+</sup> , 0.2%Tm <sup>3+</sup>                                    |                                                                                                                         | 303-693         | 10.05                               | 1.29                                | This Work |
| CaLaLiTeO <sub>6</sub> : 5%Yb <sup>3+</sup> , 0.2%Tm <sup>3+</sup>                                    |                                                                                                                         |                 | 1.19                                | 1.22                                |           |
| SrLaLiTeO <sub>6</sub> : 5%Yb <sup>3+</sup> , 0.2%Tm <sup>3+</sup>                                    | <sup>3</sup> F <sub>2,3</sub> → <sup>3</sup> H <sub>6</sub> / <sup>1</sup> G <sub>4</sub> → <sup>3</sup> H <sub>6</sub> |                 | 2.83                                | 1.35                                |           |
| BaLaLiTeO <sub>6</sub> : 5%Yb <sup>3+</sup> , 0.2%Tm <sup>3+</sup>                                    |                                                                                                                         |                 | 5.87                                | 1.22                                |           |

## References

- 1 W. Chen, J. Cao, F. Hu, R. Wei, L. Chen and H. Guo, Sr<sub>2</sub>GdF<sub>7</sub>:Tm<sup>3+</sup>/Yb<sup>3+</sup> glass ceramic: A highly sensitive optical thermometer based on FIR technique, *Journal of Alloys and Compounds*, 2018, **735**, 2544-2550.
- 2 S. Chen, W. Song, J. Cao, F. Hu and H. Guo, Highly sensitive optical thermometer based on FIR technique of transparent NaY<sub>2</sub>F<sub>7</sub>:Tm<sup>3+</sup>/Yb<sup>3+</sup> glass ceramic, *Journal of Alloys and Compounds*, 2020, **825**, 154011.
- 3 N. Rakov, S. A. Vieira and A. S. L. Gomes, Tm<sup>3+</sup>/Yb<sup>3+</sup> co-doped SrF<sub>2</sub> up-conversion phosphors for non-invasive optical thermometry: ratiometric approach using thermal and non-thermal coupled fluorescent emission bands, *Applied Physics A*, 2021, **127**.
- 4 E. Casagrande, M. Back, D. Cristofori, J. Ueda, S. Tanabe, S. Palazzolo, F. Rizzolio, V. Canzonieri, E. Trave and P. Riello, Upconversion-mediated Boltzmann thermometry in double-layered Bi<sub>2</sub>SiO<sub>5</sub>:Yb<sup>3+</sup>, Tm<sup>3+</sup>@SiO<sub>2</sub> hollow nanoparticles, *Journal of Materials Chemistry C*, 2020, **8**, 7828-7836.
- 5 K. Zhu, H. Xu, Z. Wang and Z. Fu, Lanthanide-doped lead-free double perovskite La<sub>2</sub>MgTiO<sub>6</sub> as ultra-bright multicolour LEDs and novel self-calibrating partition optical thermometer, *Inorganic Chemistry Frontiers*, 2023, DOI: 10.1039/d3qi00529a, 3383-3395.
- 6 Q. Xiao, X. Dong, X. Yin, H. Wang, H. Zhong, K. Liu, B. Dong and X. Luo, Promising Yb<sup>3+</sup>-sensitized La<sub>2</sub>Mo<sub>2</sub>O<sub>9</sub> phosphors for multi-color up-conversion luminescence and optical temperature sensing, *Journal of Alloys and Compounds*, 2022, **895**, 162686.
- 7 S. Liu, J. Cui, J. Jia, J. Fu, W. You, Q. Zeng, Y. Yang and X. Ye, High sensitive Ln<sup>3+</sup>/Tm<sup>3+</sup>/Yb<sup>3+</sup> (Ln<sup>3+</sup> = Ho<sup>3+</sup>, Er<sup>3+</sup>) tri-doped Ba<sub>3</sub>Y<sub>4</sub>O<sub>9</sub> upconverting optical thermometric materials based on diverse thermal response from non-thermally coupled energy levels, *Ceramics International*, 2019, **45**, 1-10.
- 8 W. Liu, X. Wang, Q. Zhu, X. Li, X. Sun and J.-G. Li, Upconversion luminescence and favorable temperature sensing performance of eulytite-type Sr<sub>3</sub>Y(PO<sub>4</sub>)<sub>3</sub>:Yb<sup>3+</sup>/Ln<sup>3+</sup> phosphors (Ln=Ho, Er, Tm), *Science and Technology of Advanced Materials*, 2019, **20**, 949-963.
- 9 X. Zhang, H. Zheng, J. Hu, F. Lu, X. Peng, R. Wei, F. Hu and H. Guo, Enhanced up-conversion luminescence and temperature sensing property of Ba Sr Lu<sub>4</sub>O<sub>9</sub>:Tm<sup>3+</sup>/Yb<sup>3+</sup> phosphors, *Ceramics International*, 2021, **47**, 32290-32296.
- 10 Y. Zhuang, D. Wang and Z. Yang, Upconversion luminescence and optical thermometry based on non-thermally-coupled levels of Ca<sub>9</sub>Y(PO<sub>4</sub>)<sub>7</sub>: Tm<sup>3+</sup>, Yb<sup>3+</sup> phosphor, *Optical Materials*, 2022, **126**, 112167.
- 11 H. Liu, Z. Zhang, J. Liu, K. Wang and Y. Zhang, Efficient upconversion and downshifting luminescence of CaIn<sub>2</sub>O<sub>4</sub>: Yb<sup>3+</sup>/Tm<sup>3+</sup>/RE<sup>3+</sup> (RE=Er/Ho) phosphor: Temperature sensing performance in the visible and near-infrared range, *Ceramics International*, 2023, **49**, 30510-30521.

- 12 V. Lojpur, M. Nikolic, L. Mancic, O. Milosevic and M. D. Dramicanin,  $\text{Y}_2\text{O}_3:\text{Yb},\text{Tm}$  and  $\text{Y}_2\text{O}_3:\text{Yb},\text{Ho}$  powders for low-temperature thermometry based on up-conversion fluorescence, *Ceramics International*, 2013, **39**, 1129-1134.
- 13 H. Lv, P. Du, W. Li and L. Luo, Tailoring of Upconversion Emission in  $\text{Tm}^{3+}/\text{Yb}^{3+}$ -Codoped  $\text{Y}_2\text{Mo}_3\text{O}_{12}$  Submicron Particles Via Thermal Stimulation Engineering for Non-invasive Thermometry, *ACS Sustainable Chemistry & Engineering*, 2022, **10**, 2450-2460.
- 14 O. A. Lipina, L. L. Surat, A. Y. Chufarov, I. V. Baklanova, A. N. Enyashin, M. A. Melkozerova, A. P. Tyutyunnik and V. G. Zubkov, Structural, electronic and optical properties of  $\text{BaRE}_6(\text{Ge}_2\text{O}_7)_2(\text{Ge}_3\text{O}_{10})$  (RE = Tm, Yb, Lu) compounds and  $\text{BaYb}_6(\text{Ge}_2\text{O}_7)_2(\text{Ge}_3\text{O}_{10}):\text{Tm}^{3+}$  and  $\text{BaLu}_6(\text{Ge}_2\text{O}_7)_2(\text{Ge}_3\text{O}_{10}):\text{Yb}^{3+},\text{Tm}^{3+}$  phosphors: potential applications in temperature sensing, *Dalton Transactions*, 2023, **52**, 7482-7494.
- 15 H. Song, C. Wang, Q. Han, X. Tang, W. Yan, Y. Chen, J. Jiang and T. Liu, Highly sensitive  $\text{Tm}^{3+}/\text{Yb}^{3+}$  codoped  $\text{SrWO}_4$  for optical thermometry, *Sensors and Actuators A: Physical*, 2018, **271**, 278-282.
- 16 Y. Wang, Y. Li, C. Ma, Z. Wen, X. Yuan and Y. Cao, Temperature sensing properties of  $\text{NaYTiO}_4:\text{Yb}/\text{Tm}$  phosphors based on near-infrared up-conversion luminescence, *Journal of Luminescence*, 2022, **248**, 118917.
- 17 A. Tyimiński, E. Śmiechowicz, I. R. Martín and T. Grzyb, Ultraviolet- and Near-Infrared-Excitable  $\text{LaPO}_4:\text{Yb}^{3+}/\text{Tm}^{3+}/\text{Ln}^{3+}$  (Ln = Eu, Tb) Nanoparticles for Luminescent Fibers and Optical Thermometers, *ACS Applied Nano Materials*, 2020, **3**, 6541-6551.
- 18 W. Ge, M. Xu, J. Shi, J. Zhu and Y. Li, Highly temperature-sensitive and blue upconversion luminescence properties of  $\text{Bi}_2\text{Ti}_2\text{O}_7:\text{Tm}^{3+}/\text{Yb}^{3+}$  nanofibers by electrospinning, *Chemical Engineering Journal*, 2020, **391**, 123546.
